# Supplementary material for: The ratiometric detection of the biomarker Ap5A for dry eye disease and physiological temperature using a rare trinuclear lanthanide metal–organic framework
Source: Royal Society of Chemistry journal article supplement (doi:10.1039/d0dt03647a), 2021-01-01
Supplement: d0dt03647a1.pdf [file d0dt03647a1.pdf]

## Supporting Information

### **Ratiometric detection of the biomarker Ap5A for dry eye and physiological temperature by a rare trinuclear lanthanide metal-organic framework**

Tifeng Xia,<sup>□a</sup> Yating Wan,<sup>b</sup> Xiayan Yan,<sup>a</sup> Li Hu,<sup>a</sup> Zhigang Wu<sup>a</sup> and Jun Zhang<sup>□a</sup>

<sup>a</sup>Institute of Materials, China Academy of Engineering Physics, Mianyang 621907, P. R. China

<sup>b</sup>Shanghai Institute of Laser Plasma, China Academy of Engineering Physics, Shanghai 201800, China

Corresponding authors:

[xiatifeng@caep.cn](mailto:xiatifeng@caep.cn), [j-zhang@caep.cn](mailto:j-zhang@caep.cn).

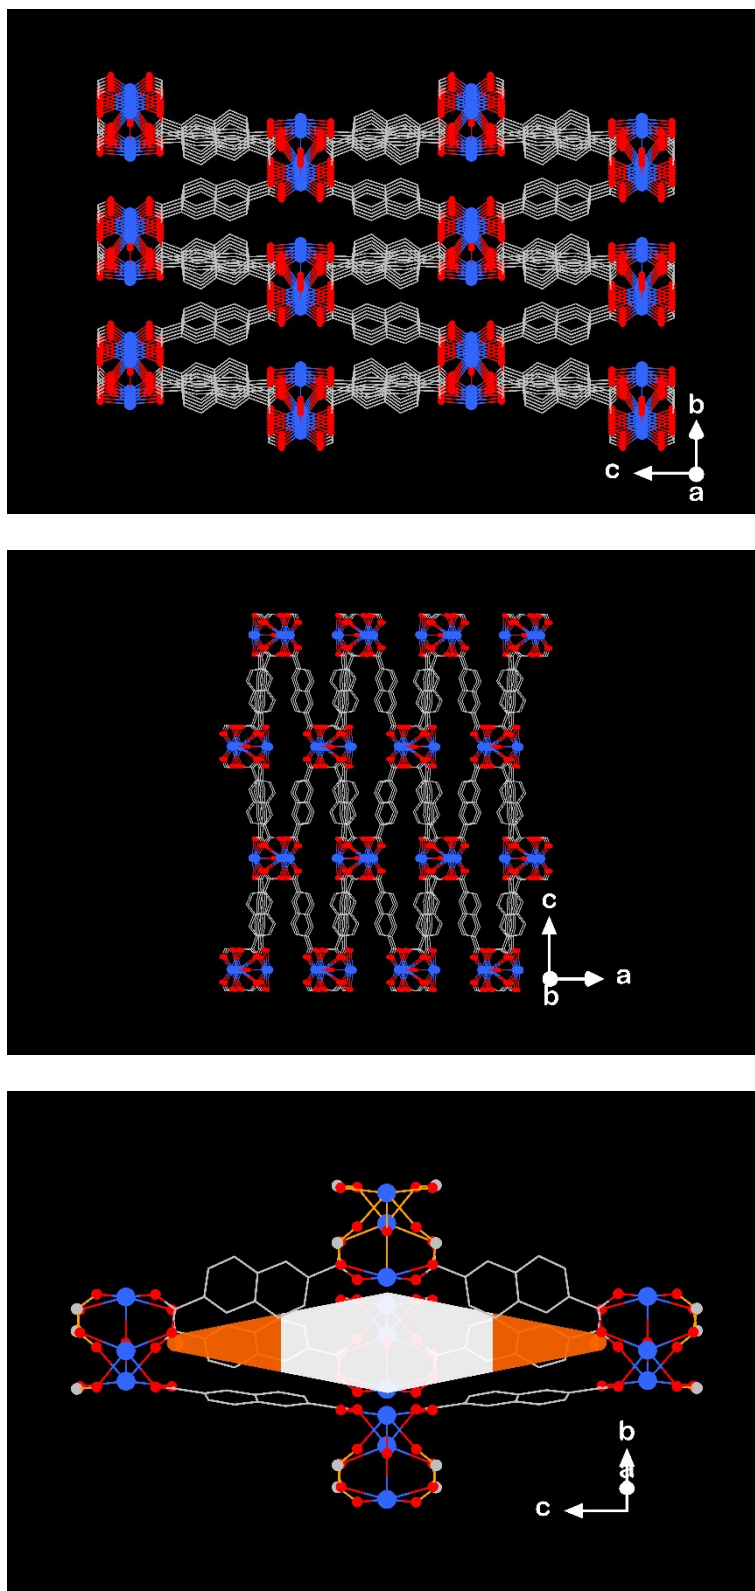

**Figure S1.** The crystal structure of Eu(2,6-NDC) view along *a*, *b* axis, and the rugby shaped cavity.

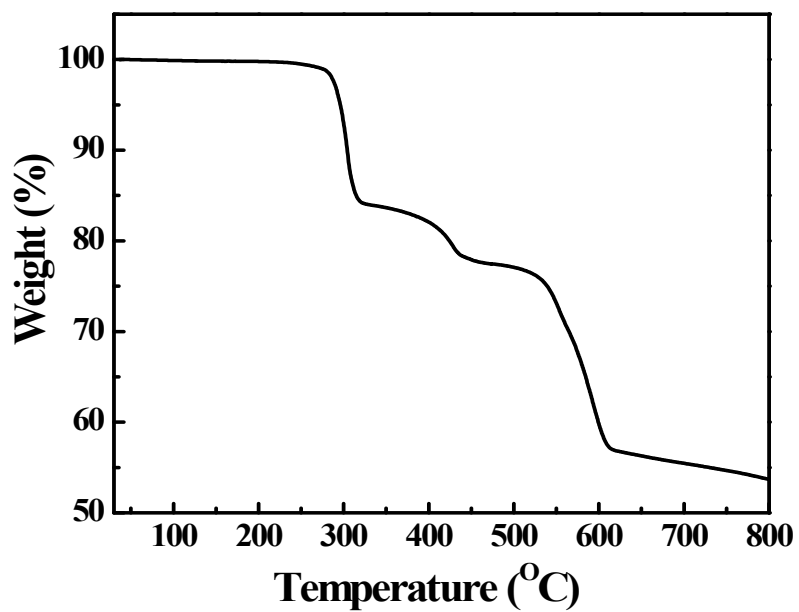

Figure S2. The TGA curve of Eu(2,6-NDC).

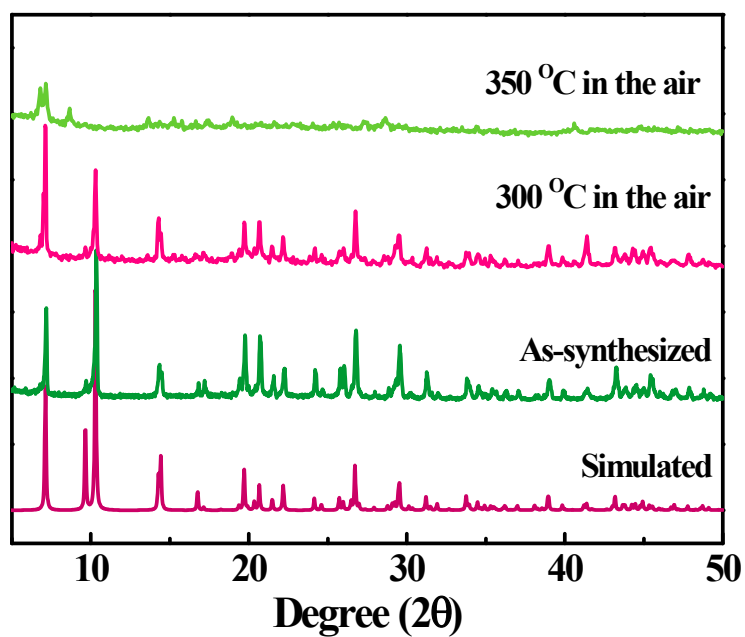

Figure S3. The PXRD pattern of Eu(2,6-NDC) after different temperature treatment.

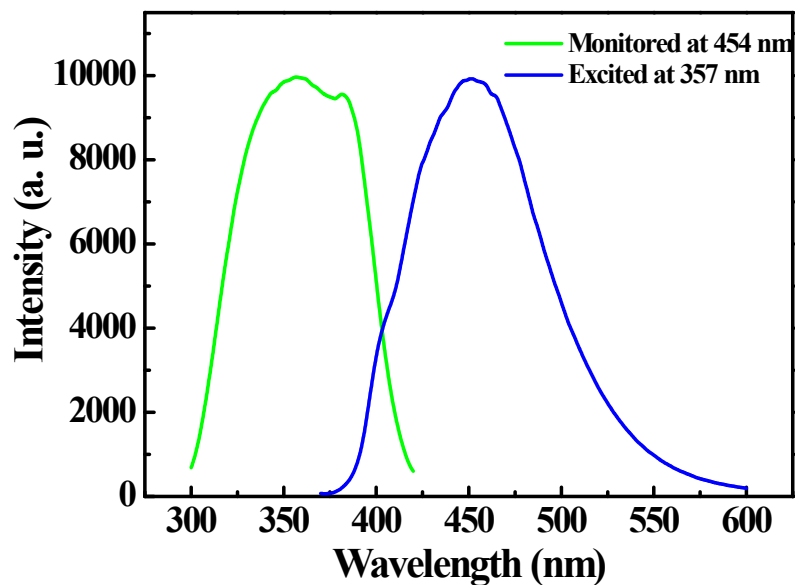

Figure S4. Excitation and emission spectra of free 2,6-H<sub>2</sub>NDC.

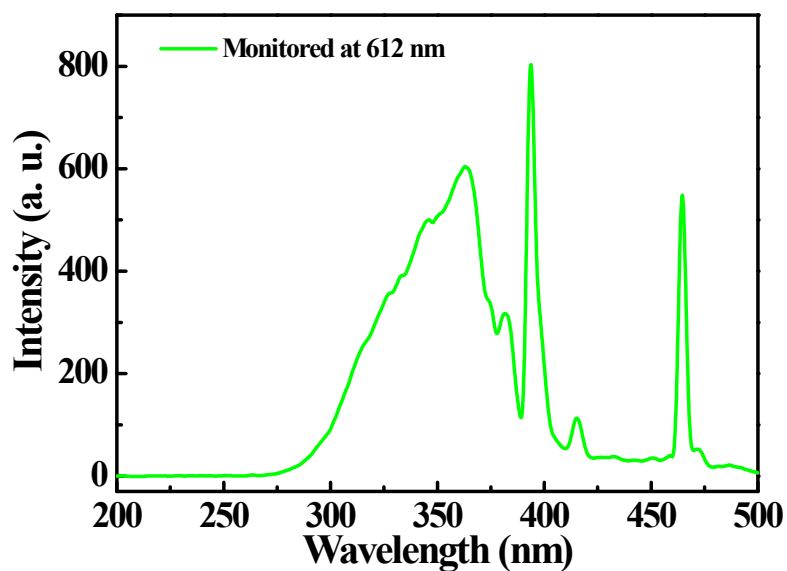

Figure S5. Excited spectrum of Eu(2,6-NDC) in solid state monitored at 612 nm.

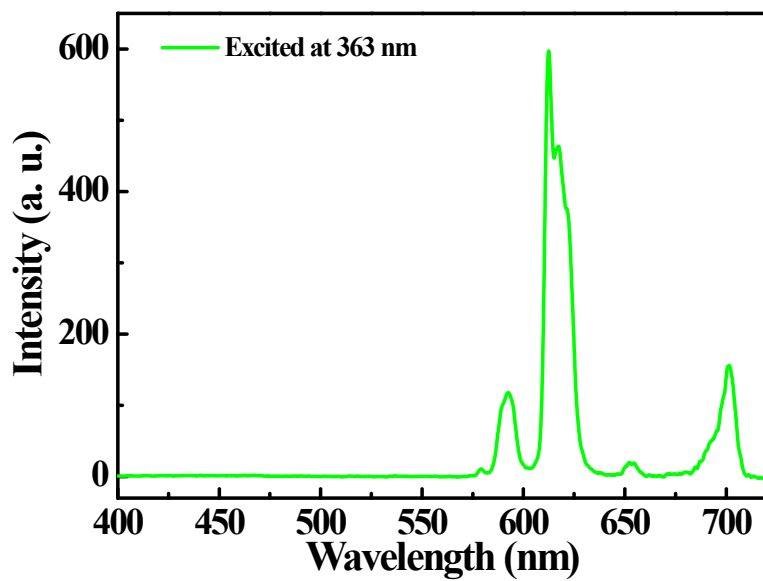

Figure S6. Emission spectrum of Eu(2,6-NDC) in solid state excited at 363 nm.

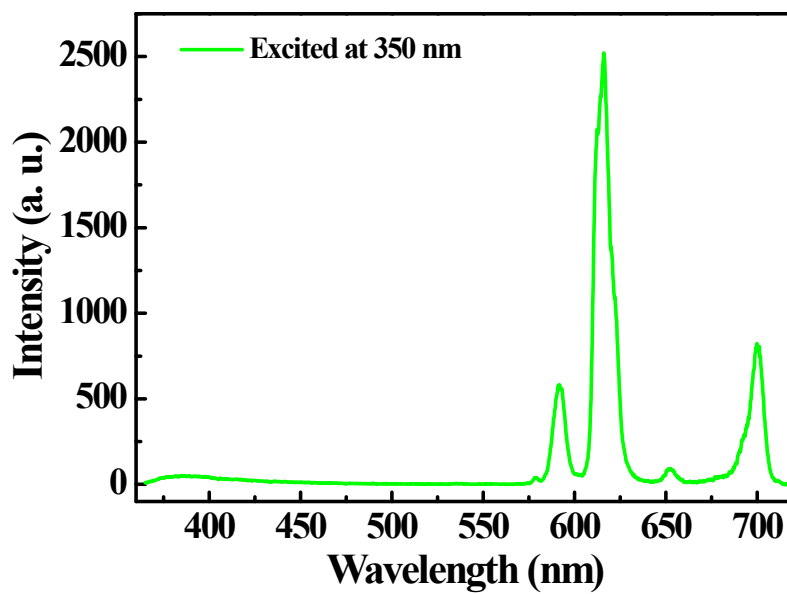

Figure S7. Emission spectrum of Eu(2,6-NDC) in water excited at 350 nm.

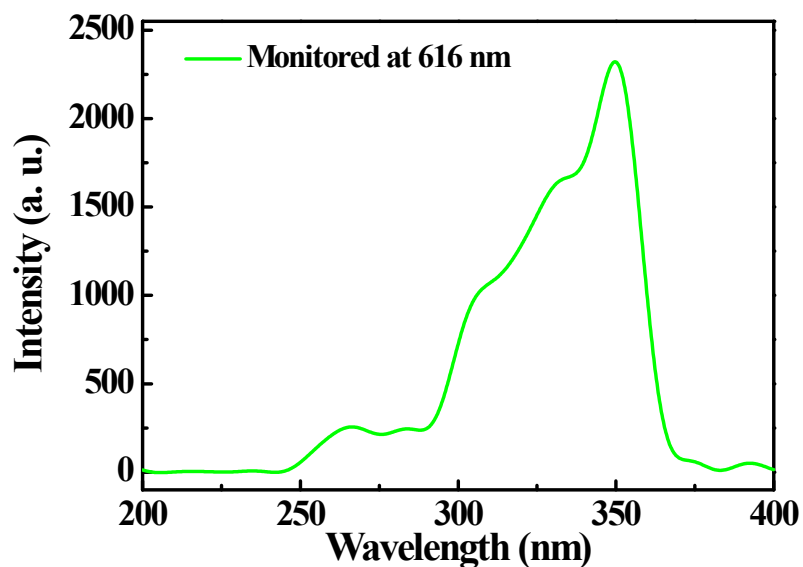

Figure S8. Excited spectrum of Eu(2,6-NDC) in water monitored at 616 nm.

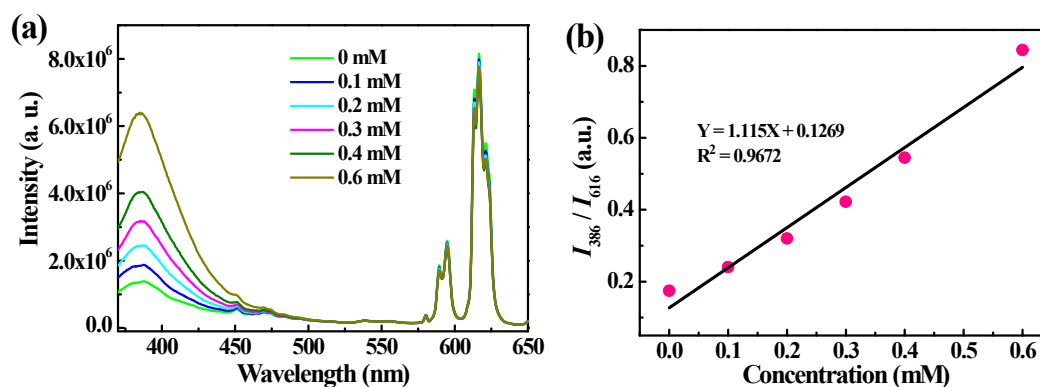

Figure S9. (a) Emission spectra of Eu(2,6-NDC) suspension upon gradual addition of Ap4A from 0 to 0.6 mM. (b) Luminescence intensity ratio ( $I_{386}/I_{616}$ ) of Eu(2,6-NDC) suspension versus the concentration of Ap4A. Inset: The linear calibration plot for Ap4A detection.

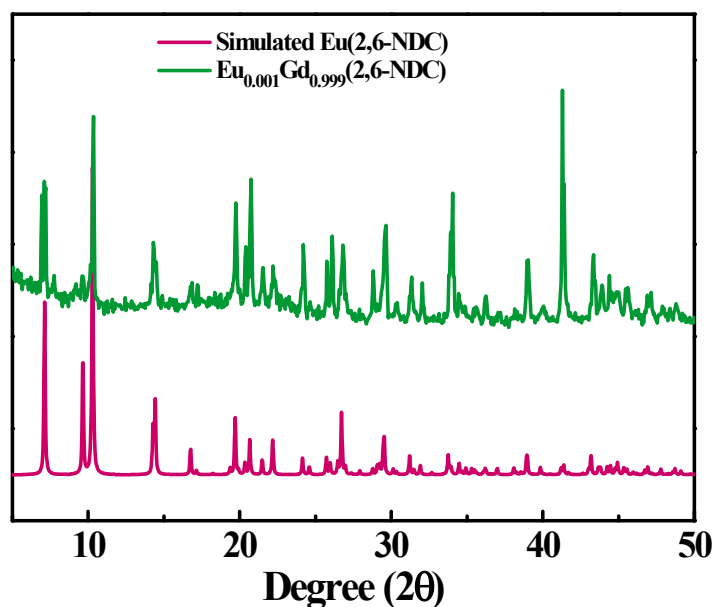

**Figure S10.** PXRD patterns of  $\text{Eu}_{0.001}\text{Gd}_{0.999}(2,6\text{-NDC})$  and simulated  $\text{Eu}(2,6\text{-NDC})$ .

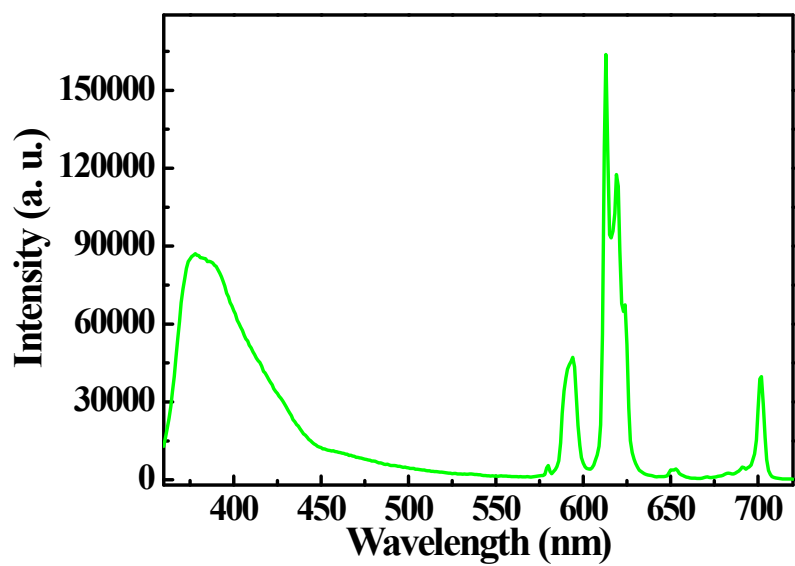

**Figure S11.** Emission spectrum of  $\text{Eu}_{0.001}\text{Gd}_{0.999}(2,6\text{-NDC})$  in solid state at 20 °C excited at 340 nm.

**Table S1.** Crystallographic Data Collection and Refinement Results of Eu(2,6-NDC).

|                                                                                         | <b>Eu(2,6-NDC)</b>                                              |
|-----------------------------------------------------------------------------------------|-----------------------------------------------------------------|
| Chemical formula                                                                        | C <sub>39</sub> H <sub>4</sub> Eu <sub>22</sub> O <sub>19</sub> |
| Formula weight                                                                          | 1250.54                                                         |
| Temperature (K)                                                                         | 293(2)                                                          |
| Wavelength (Å)                                                                          | 0.71073                                                         |
| Crystal system                                                                          | Hexagonal                                                       |
| Space group                                                                             | <i>P</i> 6 <sub>3</sub> / <i>m</i>                              |
| <i>a</i> (Å)                                                                            | 10.5738(4)                                                      |
| <i>b</i> (Å)                                                                            | 10.5738(4)                                                      |
| <i>c</i> (Å)                                                                            | 24.7974(10)                                                     |
| $\alpha$ (°)                                                                            | 90                                                              |
| $\beta$ (°)                                                                             | 90                                                              |
| $\gamma$ (°)                                                                            | 120                                                             |
| <i>V</i> (Å <sup>3</sup> )                                                              | 2401.0(2)                                                       |
| <i>Z</i>                                                                                | 2                                                               |
| Density (calculated g·cm <sup>-3</sup> )                                                | 1.776                                                           |
| Absorbance coefficient (mm <sup>-1</sup> )                                              | 3.944                                                           |
| <i>F</i> (000)                                                                          | 1231                                                            |
| Crystal size (mm <sup>3</sup> )                                                         | 0.4X0.4X0.2                                                     |
| <i>R</i> (int)                                                                          | 0.0309                                                          |
| Goodness of fit on <i>F</i> <sub>2</sub>                                                | 1.175                                                           |
| <i>R</i> <sub>1</sub> , <i>wR</i> <sub>2</sub> [ <i>I</i> >2σ( <i>I</i> )] <sup>a</sup> | 0.0405, 0.1031                                                  |
| <i>R</i> <sub>1</sub> , <i>wR</i> <sub>2</sub> (all data) <sup>a</sup>                  | 0.0428, 0.1043                                                  |
| Largest difference peak and hole (e·Å <sup>-3</sup> )                                   | 1.285, -1.621                                                   |

$$R1 = \sum (|F_o| - |F_c|) / \sum |F_o|; wR2 = \left[ \frac{\sum w(|F_o| - |F_c|)^2}{\sum wF_o^2} \right]^{1/2}$$

a
